# Supplementary material
Source: Springer Nature journal article supplement (https://www.springerprofessional.de/resource/supplementary/13638_2012_613_MOESM10_ESM.pdf/11898360)

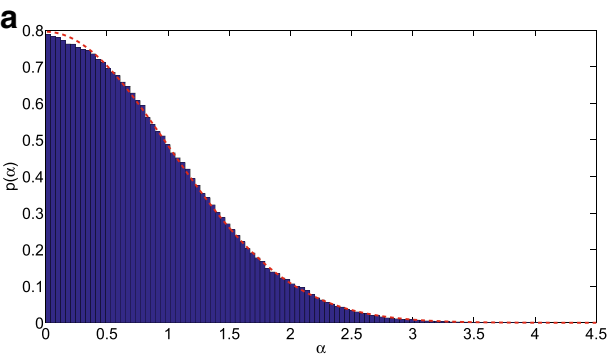

$\kappa = 0.1, \mu = 0.5.$

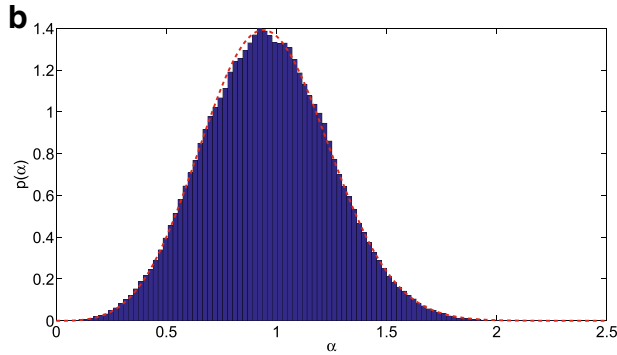

$\kappa = 1.5, \mu = 2.0.$

Supplement: MOESM10 [file 11898360]
